# Supplementary material for: Different Phenotypes of the Two Chinese Probands with the Same c.889G>A (p.C162Y) Mutation in COCH Gene Verify Different Mechanisms Underlying Autosomal Dominant Nonsyndromic Deafness 9
Source: PubMed Central journal article supplement (PMC5243127; doi:10.1371/journal.pone.0170011), 2017-01-18
Supplement: pone.0170011.s001.pdf [file pone.0170011.s001.pdf]

**S1 Table. The targeted genes for targeted next-generation sequencing.**

|         |         |         |        |          |        |          |
|---------|---------|---------|--------|----------|--------|----------|
| ACTG1   | ALX3    | BSND    | CABP2  | CCDC50   | CDH23  | CEACAM16 |
| CHD7    | CIB2    | CLDN14  | CLPP   | CLRN1    | COCH   | COL11A1  |
| COL11A2 | COL2A1  | COL4A3  | COL4A4 | COL4A5   | COL4A6 | COL9A1   |
| COL9A2  | COMT2   | CRYM    | DFNA5  | DFNB31   | DFNB59 | DIABLO   |
| DIAPH1  | DIAPH3  | DSPP    | ECM1   | EDN3     | EDNRB  | ELMOD3   |
| ESPN    | ESRRB   | EYA1    | EYA4   | FGF3     | FGF8   | FGFR1    |
| FGFR3   | FLNA    | FOXI1   | FREM1  | GATA3    | GIPC3  | GJB2     |
| GJB3    | GJB6    | GPR98   | GPSM2  | GRHL2    | GRXCR1 | HARS     |
| HARS2   | HGF     | HMX1    | HOXA2  | HSD17B4  | IL13   | ILDR1    |
| KARS    | KCNE1   | KCNJ10  | KCNQ1  | KCNQ4    | KRT9   | LAMA3    |
| LARS2   | LHFPL5  | LOXHD1  | LRTOMT | MARVELD2 | MIR96  | MITF     |
| MSRB3   | MYH14   | MYH9    | MYO15A | MYO1A    | MYO3A  | MYO6     |
| MYO7A   | NDP     | NF2     | OTOA   | OTOF     | P2RX2  | PABPN1   |
| PAX3    | PCDH15  | PDZD7   | PNPT1  | POLR1C   | POLR1D | POU3F4   |
| POU4F3  | PROK2   | PROKR2  | PRPS1  | PTPRQ    | RDX    | RPGR     |
| SALL1   | SALL4   | SEC23A  | SEMA3E | SERPINB6 | SIX1   | SIX5     |
| SLC17A8 | SLC26A4 | SLC26A5 | SMPX   | SNAI2    | SOX10  | STRC     |
| TBC1D24 | TCOF1   | TECTA   | TIMM8A | TJP2     | TMC1   | TMIE     |
| TMPRSS3 | TNC     | TPRN    | TRIOBP | TRMU     | TSPEAR | USH1C    |
| USH1G   | USH2A   | WFS1    |        |          |        |          |
