# Supplementary material for: Different Phenotypes of the Two Chinese Probands with the Same c.889G>A (p.C162Y) Mutation in COCH Gene Verify Different Mechanisms Underlying Autosomal Dominant Nonsyndromic Deafness 9
Source: PubMed Central journal article supplement (PMC5243127; doi:10.1371/journal.pone.0170011), 2017-01-18
Supplement: pone.0170011.s002.pdf [file pone.0170011.s002.pdf]

S2 Table. Seven variants identified by targeted next-generation exome sequencing.

| UniqID                | MutPosition   | Disease                                                                                  | Genetic Mode | SIFT | SIFT_predict | PolyPhen_2 | PolyPhen_2_predict | MutationTaster | MutationTaster_predict |
|-----------------------|---------------|------------------------------------------------------------------------------------------|--------------|------|--------------|------------|--------------------|----------------|------------------------|
| COCH-chr14-31349796   | COCH:C162Y    | DFNA9(autosomal dominant nonsyndromic sensorineural deafness 9)                          | AD           | 0    | Damaging     | 0.998      | Probably_damaging  | 1              | Disease_causing        |
| FLNA-chrX-153582543   | FLNA:R1837C   | Intestinal pseudoobstruction                                                             | XR           | 0    | Damaging     | 0.998      | Probably_damaging  | 1              | Disease_causing        |
| KCNJ10-chr1-160011511 | KCNJ10:R271H  | Deafness, Autosomal Recessive 4, With Enlarged Vestibular Aqueduct.                      | AR           | 0.03 | Damaging     | 0.11       | Benign             | 1              | Disease_causing        |
| KCNQ1-chr1-1-2610034  | KCNQ1:P448R   | Long Qt Syndrome 1 and Jervell And Lange-Nielsen Syndrome.                               | AD           | 0.55 | Tolerable    | 0.051      | Benign             | 1              | Polymorphism           |
| LOXHD1-chr18-44137388 | LOXHD1:D1094G | Deafness, Autosomal Recessive 77                                                         | AR           | 0.03 | Damaging     | 1          | Probably_damaging  | 1              | Disease_causing        |
| RPGR-chrX-38164037    | RPGR:A262G    | Retinitis Pigmentosa, X-Linked, And Sinorespiratory Infections, With Or Without Deafness | XD           | 1    | Tolerable    | 0.182      | Benign             | 1              | Polymorphism           |
| SIX1-chr14-61113151   | SIX1:Q235H    | Deafness, Autosomal Dominant 23                                                          | AD           | 0.32 | Tolerable    | 0.947      | Possibly_damaging  | 1              | Disease_causing        |
